# Supplementary material for: Single center first year experience and outcomes with Impella 5.5 left ventricular assist device
Source: PubMed Central journal article supplement (PMC9128113; doi:10.1186/s13019-022-01871-1), 2022-05-23

## Functional Status

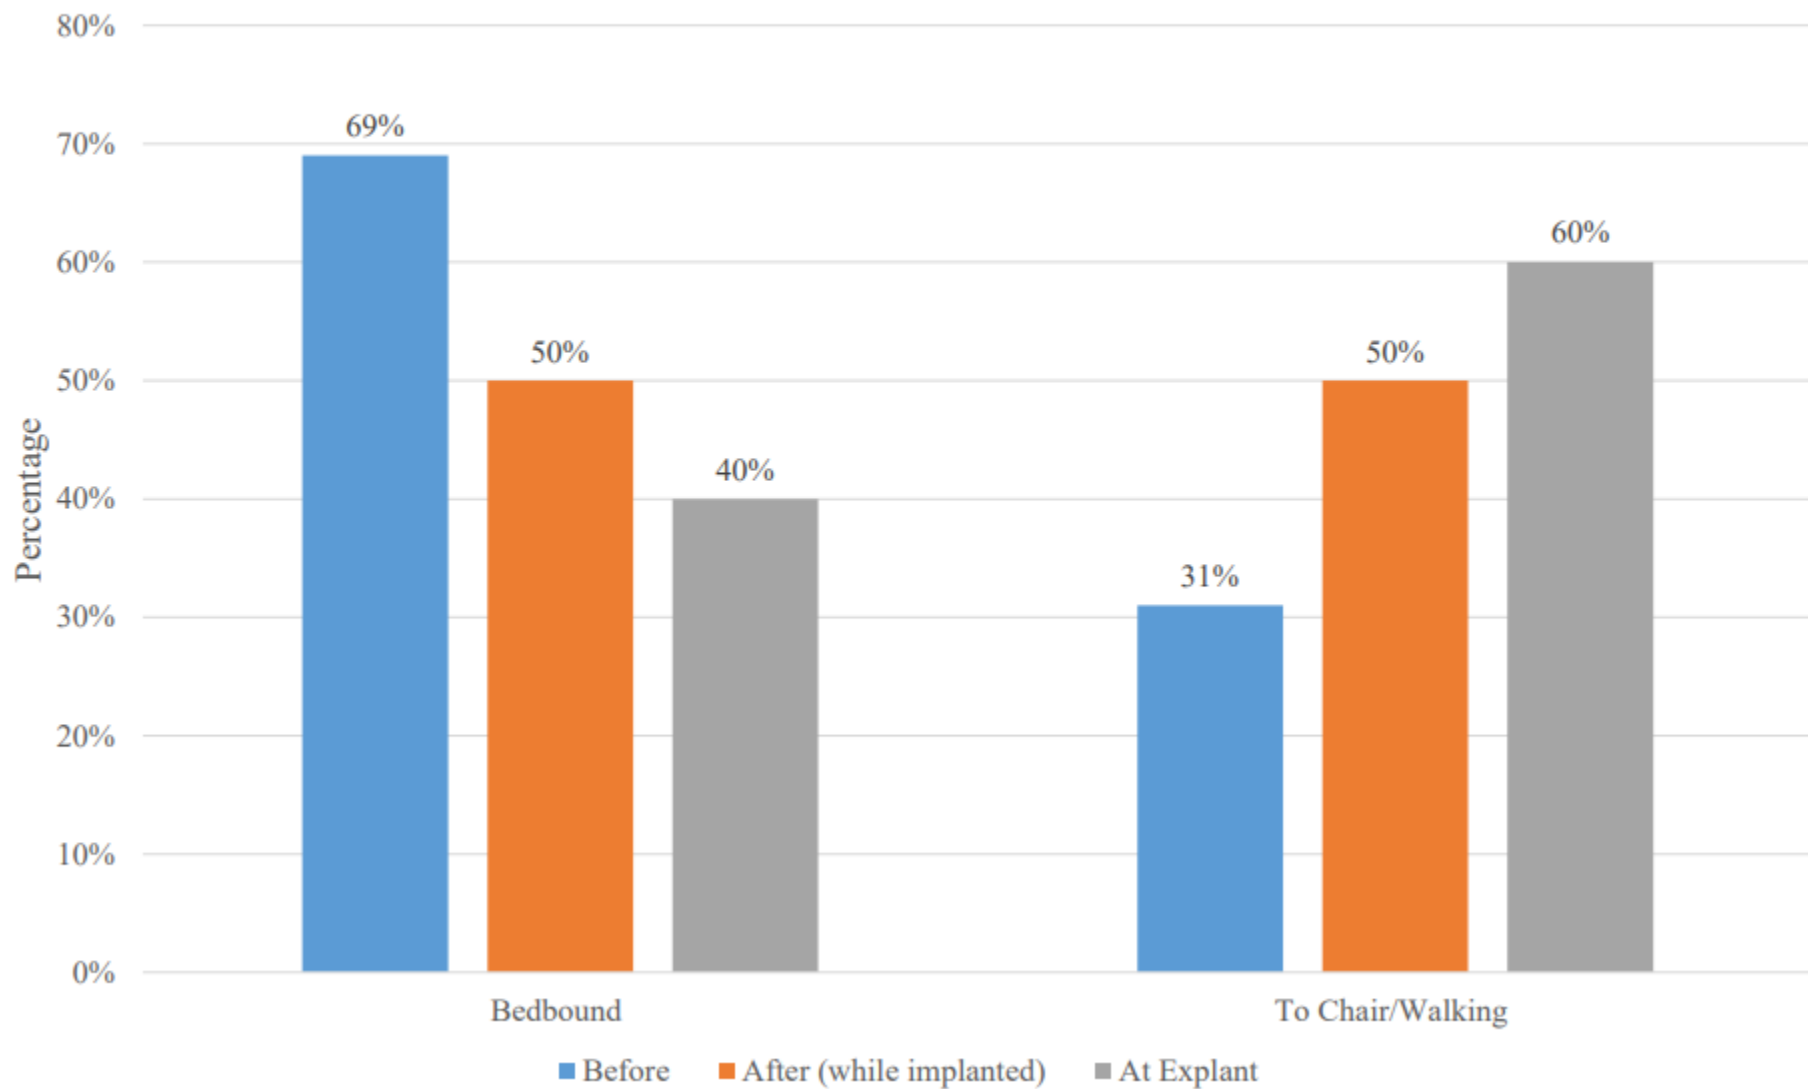

# Respiratory Status

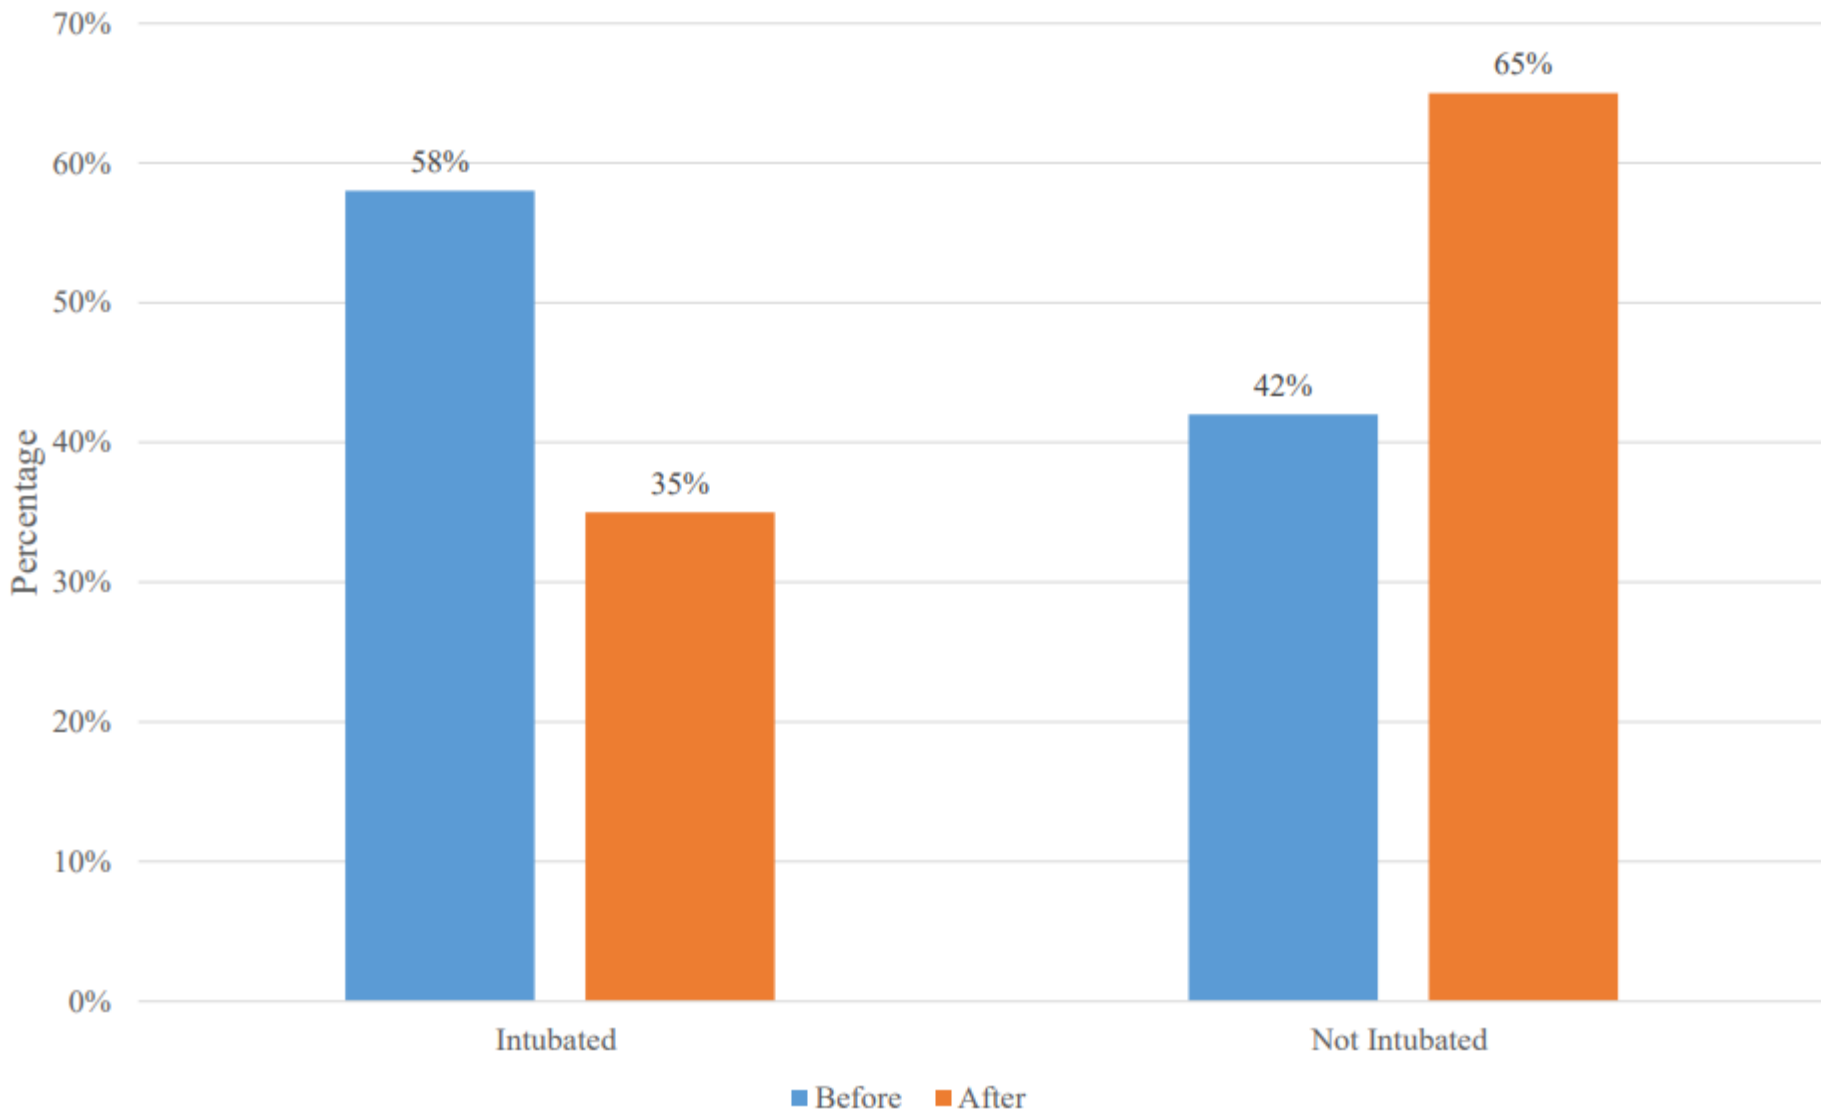

Supplement: 13019_2022_1871_MOESM2_ESM.pdf [file 13019_2022_1871_MOESM2_ESM.pdf]
